# Supplementary material
Source: publisher figshare collection journal article supplement (https://plos.figshare.com/articles/dataset/_/1374928)
Supplement: Supplementary file [file 1]

| $\rho$ | $S$ | $R$  | Model          | $R$ bias | Relative $R$ error |
|--------|-----|------|----------------|----------|--------------------|
| 0.2    | 0.2 | 0.16 | Homogeneous    | -0.025   | 0.38               |
|        |     |      | Age-structured | -0.004   | 0.39               |
| 0.2    | 1   | 0.2  | Homogeneous    | -0.020   | 0.30               |
|        |     |      | Age-structured | 0.014    | 0.34               |
| 0.7    | 0.2 | 0.56 | Homogeneous    | -0.070   | 0.21               |
|        |     |      | Age-structured | -0.030   | 0.18               |
| 0.7    | 1   | 0.7  | Homogeneous    | -0.047   | 0.13               |
|        |     |      | Age-structured | -0.020   | 0.14               |
